# Supplementary material for: Cisplatin reacts with histone H1 and the adduct forms a ternary complex with DNA
Source: Royal Society of Chemistry journal article supplement (doi:10.1039/c8mt00358k), 2019-01-08
Supplement: c8mt00358k1.pdf [file c8mt00358k1.pdf]

## Electronic Supporting Information

for

### Cisplatin Reacts with Histone H1 and the Adduct Forms Ternary Complex with DNA

#### Contents

**Scheme S1.** Protein sequences and platinum complexes

**Table S1.** Sequences of a human cDNA library, H1<sub>N90</sub> and PCR primers

**Figure S1.** ESI-MS spectra of H1<sub>N90</sub>

**Figure S2.** ESI-MS spectra of H1<sub>N90</sub> platination adducts

**Figure S3.** Tandem mass spectrometry of product M1

**Figure S4.** Tandem mass spectrometry of product M3

**Figure S5.** NMR spectra of <sup>15</sup>N-cisplatin reacted with H1<sub>N7</sub>

**Figure S6.** NMR spectra of <sup>15</sup>N-cisplatin reacted with dsDNA2

**Figure S7.** Tricine-SDS-PAGE analysis of the reaction of platinated H1<sub>N90</sub> with dsDNA

**Figure S8.** ESI-MS spectra of the reaction products of cisplatin/H1<sub>N7</sub> with dsDNA2

A

histone H1.4

MSETAPAAPA APAPAEKTPV KKKARKSAGA AKRKASGPPV SELITKAVAA  
 SKERSGVSLA ALKKALAAAG YDVEKNNSRI KLGLKSLVSK GTLVQTKGTG  
 ASGSFKLNKK AASGEAKPKA KKAGAAKAKK PAGAAKPKK ATGAATPKKS  
 AKKTPKKAKK PAAAAGAKKA KSPKKAKAAK PKKAPKSPAK AKAVKPKAAK  
 PKTAKPKAAK PKKAAAKK

histone H1.0

MTENSTSAAPA AKPKRKASK KSTDHPKYS MIVAAIQAEK NRAGSSRQSI  
 QKYIKSHYKV GENADSIKL SIKRLVTTGV LKQTKGVGAS GSFRLAKSDE  
 PKKSVAFKKT KKEIKKVATP KKASKPKKAA SKAPTKPKA YPVKKAKKLL  
 AATPKKAKKP KTVKAKPVKA SKPKKAKPV PKAKSSAKRA GKKK

B

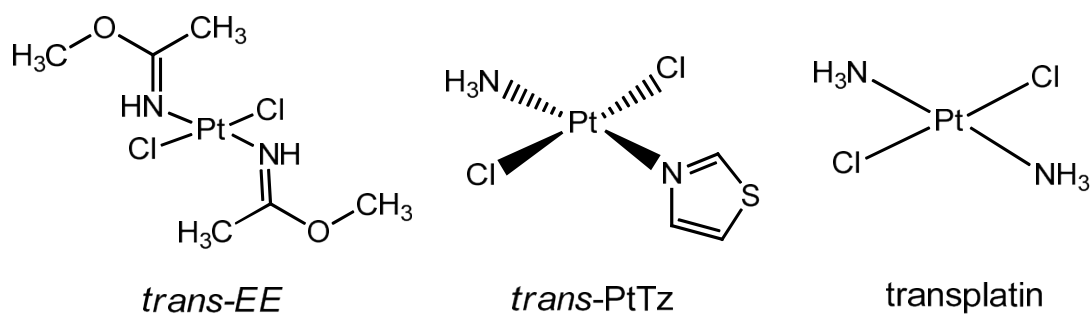

**Scheme S1** Protein sequences and platinum complexes used in this work. (A) Sequences of human histones H1.4 and H1.0. The sequences used in this work are highlighted in yellow. (B) Structures of *trans-EE*, *trans-PtTz*, and transplatin.

**Table S1** Sequence information in construction of the H1<sub>N90</sub> plasmid

|             |                                                                                                                                                                                                                                                                                               |
|-------------|-----------------------------------------------------------------------------------------------------------------------------------------------------------------------------------------------------------------------------------------------------------------------------------------------|
| cDNA        | ATGTCCGAGACTGCGCCTGCCGCGCCCGCTGCTCCGCCCCCTGCCGAGAAGACTCCCCT<br>GAAGAAGAAGGCCCGCAAGTCTGCAGGTGCGGCCAAGCGCAAAGCGTCTGGGCCCCC<br>GGTGTCCGAGCTCATTACTAAAGCTGTTGCCGCTCCAAGGAGCGCAGCGGCGTATCTT<br>TGGCCGCTCTCAAGAAAGCGCTGGCAGCCGCTGGCTATGACGTGGAGAAAAACAACAG<br>CCGCATCAAGCTGGGTCTCAAGAGCCTGGTGAGCAAG |
| PCR primers | Forward primer: CGCGGATCCGAGAACCTGTACTTCCAATCCATGTCC<br>GAGACTGCGCCT<br>Reverse primer: CCGCTCGAGGGATTGGAAGTACAGGTTCTCCTTGCT<br>CACCAGGCTCTT                                                                                                                                                  |

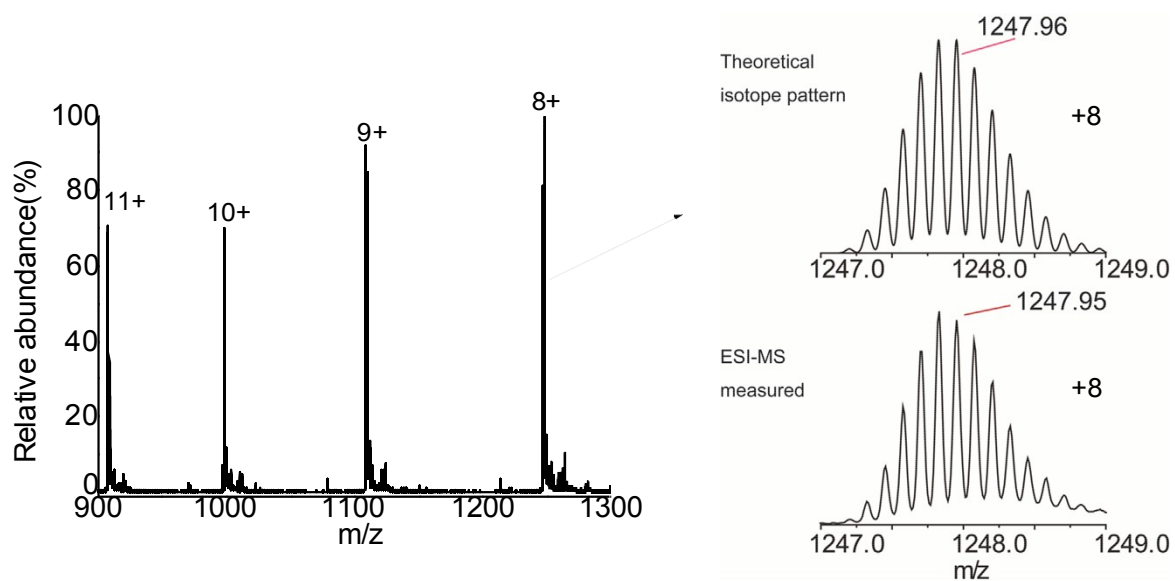

**Figure S1.** ESI-MS spectra of H1<sub>N90</sub>. The theoretical isotopic pattern is given for comparison.

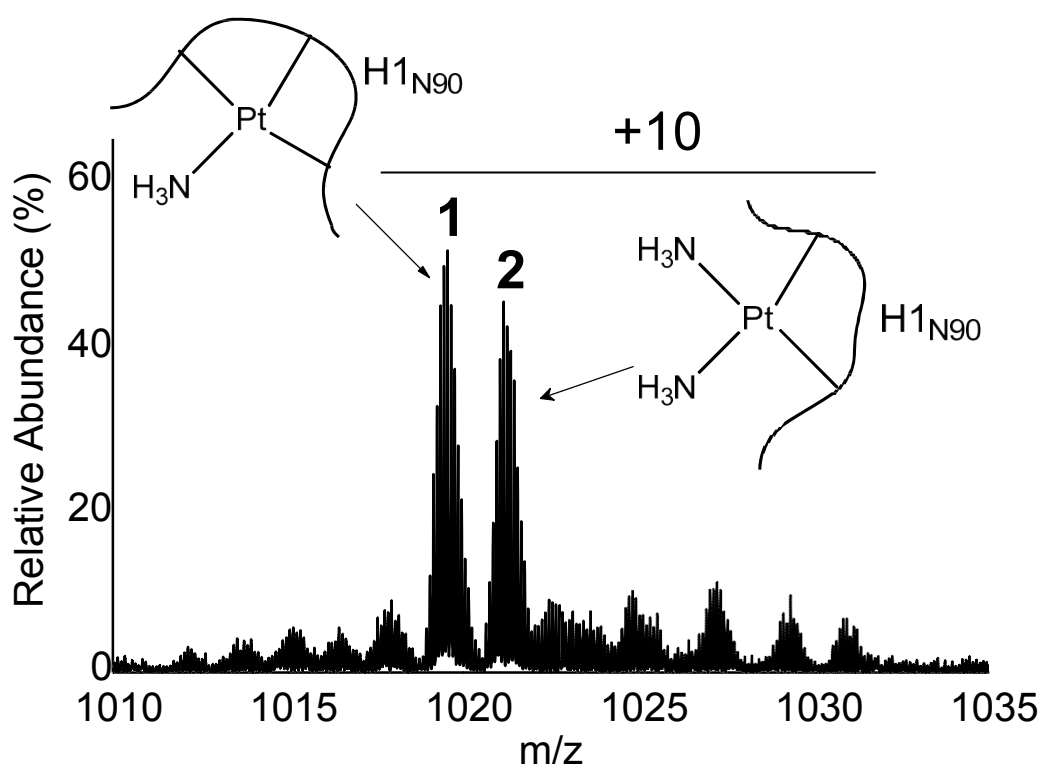

**Figure S2.** ESI-MS spectra of H1<sub>N90</sub> reacted with equimolar cisplatin. The selected region shows products with +10 charges, Pt(NH<sub>3</sub>)(H1<sub>N90</sub>) and Pt(NH<sub>3</sub>)<sub>2</sub>(H1<sub>N90</sub>) were the two major products.

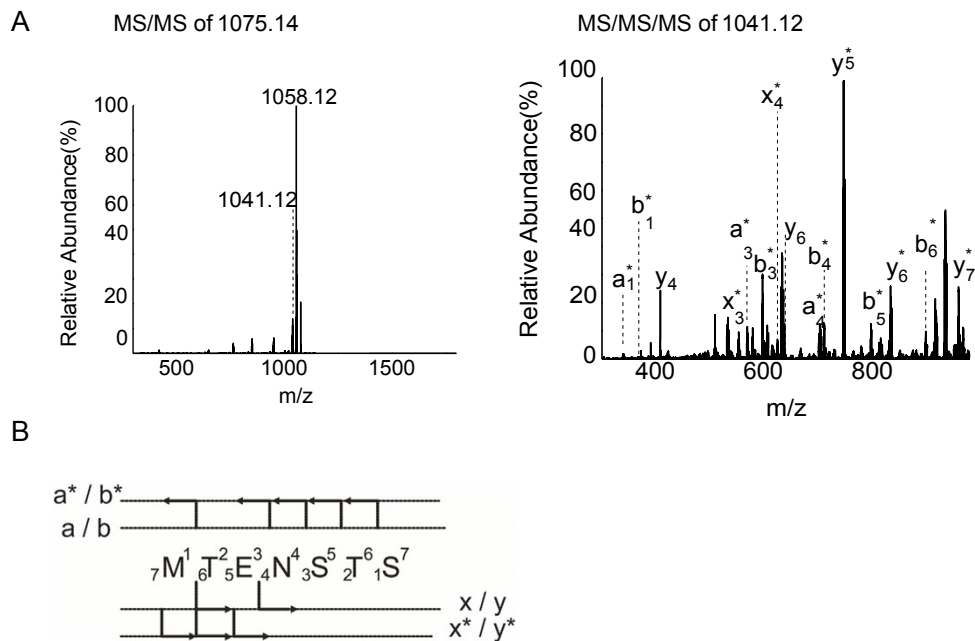

**Figure S3.** Tandem MS spectrometry of the platinated product M1 from the reaction of H1<sub>N7</sub> with cisplatin. The asterisk indicates the platinum containing fragments. (A) ESI-MS/MS and MS/MS/MS spectra from the CID experiment on the single charged peptide at m/z 1075.14 and 1041.12. (B) The fragmentation scheme of the MS/MS/MS spectrum. The black arrows denote the fragment ions observed in the ESI-MS/MS/MS spectra.

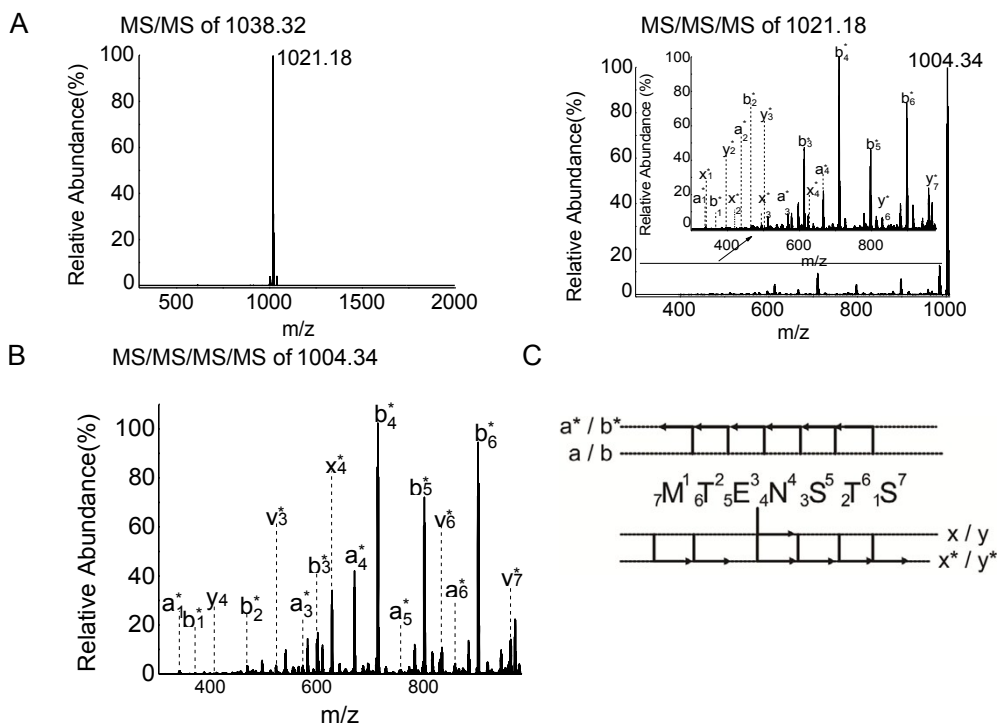

**Figure S4.** ESI-MS/MS, MS/MS/MS and MS/MS/MS/MS spectra of the product M3, showing the fragments from the ion at m/z 1038.32 (A), 1021.18 (A) and 1004.34 (B). Fragmentation schemes based on the spectra (A) and (B) are shown in (C).

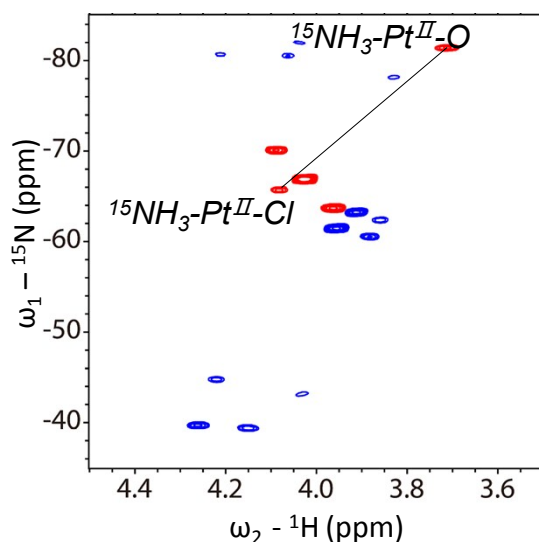

**Figure S5.** NMR spectra of  $^{15}\text{N}$ -cisplatin in the reaction with H1<sub>N7</sub>. Overlay of  $^1\text{H}$ ,  $^{15}\text{N}$ -HSQC NMR spectra of  $^{15}\text{N}$  labeled cisplatin before (red) and after (blue) the incubation with 1.2 molar equivalents of H1<sub>N7</sub> in 10 mM phosphate buffer at 37 °C for 23.5 h.

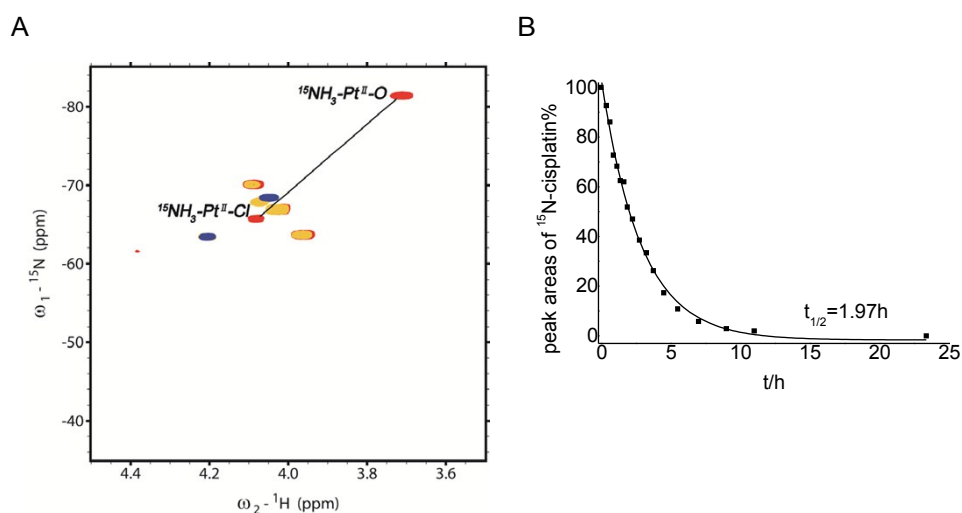

**Figure S6.** NMR spectra monitoring the reaction of  $^{15}\text{N}$ -cisplatin with dsDNA2. (A) Overlay of  $^1\text{H}$ ,  $^{15}\text{N}$ -HSQC NMR spectra of  $^{15}\text{N}$  labeled cisplatin (1 mM) incubated with equimolar dsDNA2 at 37 °C for 0 h (red), 2 h (gold) and 23.5 h (blue) in 10 mM PB (pH 7.0). (B) Plot of the ratio of unreacted cisplatin to initial cisplatin versus time for the reaction of cisplatin with dsDNA2.

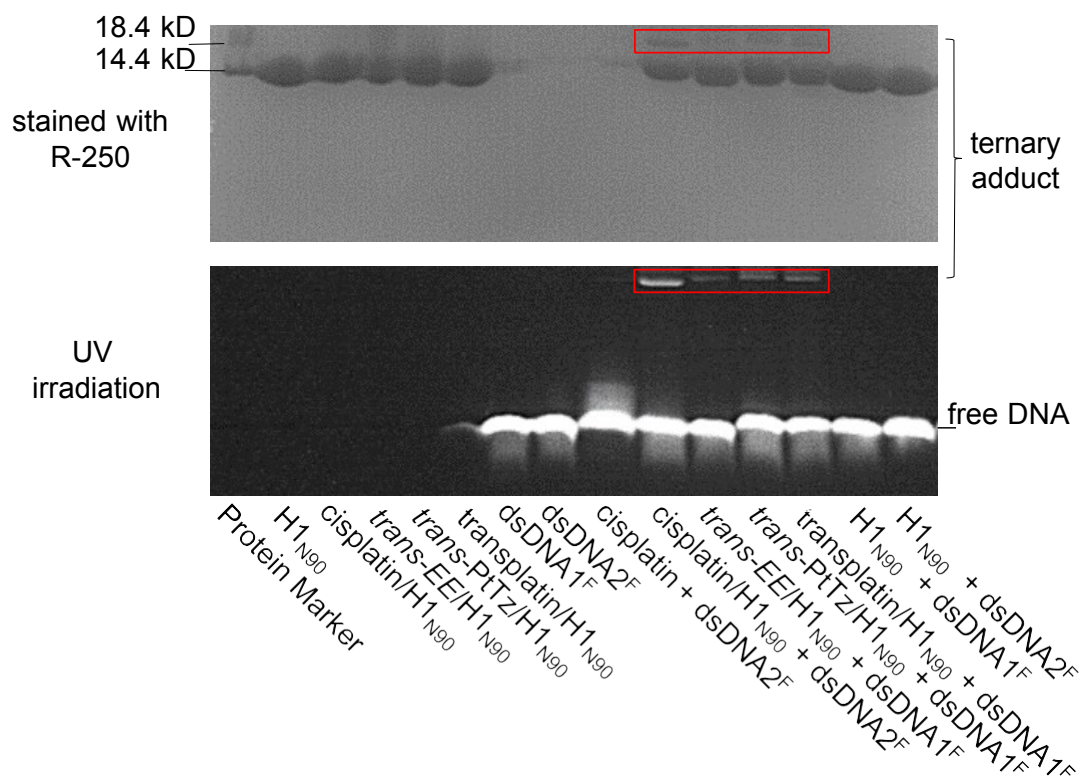

**Figure S7.** Tricine-SDS-PAGE analysis of the reaction of platinated H1<sub>N90</sub> with the FAM 5' labeled dsDNA. Platinated-H1 obtained with different compounds (cisplatin, *trans-EE*, *trans-PtTz*, and transplatin) were reacted with dsDNA<sup>F</sup> or dsDNA<sup>1F</sup> (Scheme 1C) for 24 h in 50 mM HEPES (pH 6.8) at 37 °C; 0.2 mM platinated/H1<sub>N90</sub> and 0.1 mM dsDNA<sup>2F</sup> or 0.1 mM dsDNA<sup>1F</sup> were used. The red boxes show the bands of the protein-Pt-DNA ternary products.

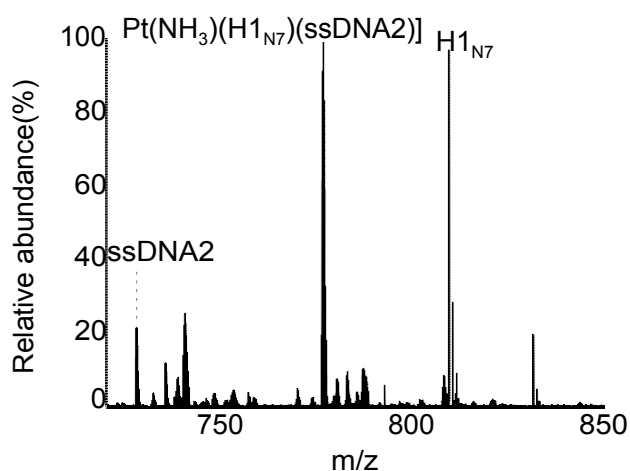

**Figure S8.** ESI-MS spectra of cisplatin/H1<sub>N7</sub> incubated with dsDNA2. The reaction was performed using 0.4 mM M2 and 0.04 mM dsDNA2 in 10 mM NH<sub>4</sub>OAc (pH 6.8).
